# Supplementary material for: A highly efficient Nafion-H catalyst for vapour phase carbonylation of dimethoxymethane
Source: Royal Society of Chemistry journal article supplement (doi:10.1039/c4ra06150k), 2014-01-01
Supplement: c4ra06150k1.pdf [file c4ra06150k1.pdf]

## A highly efficient Nafion-H catalyst for vapour phase

### carbonylation of dimethoxymethane

Shiping Liu,<sup>a,b</sup> Wenliang Zhu,<sup>a</sup> Lei Shi,<sup>a</sup> Hongchao Liu,<sup>a</sup> Yong Liu,<sup>a</sup> Youming Ni,<sup>a</sup> Lina Li,<sup>a,b</sup> Hui Zhou,<sup>a,b</sup> Shutao Xu<sup>a</sup> and Zhongmin Liu<sup>a\*</sup>

#### Experimental Section

##### Preparation of catalysts

**Nafion-H catalyst:** Nafion-H resin powder (<200 mesh, commercially available from Aldrich) was mixed with silica powder by mechanical mixture. The Nafion-H resins loading in the catalyst were 60 wt.%. The obtained mixture was pressed to pellets, then, crushed, sieved to 40–60 mesh particles.

**Polystyrenesulfonic acid resins catalysts:** Polystyrenesulfonic acid resins, which were purchased from Dandong Mingzhu Special Type Resin Co., Ltd., were used without further treatment.

**H-faujasite catalysts:** Zeolite samples were obtained commercially with different Si/Al ratios in H<sup>+</sup> form (Si/Al=4.3, Nankai University catalyst Co., Ltd.; Si/Al=15, Si/Al=40, Zeolyst). The zeolite samples were calcined in static air at 723 K for 4 h, and then, pelletized, crushed, sieved to 40–60 mesh size for activity test.

##### Sample Preparation for <sup>1</sup>H MAS NMR

Prior to the pyridine-*d*<sub>5</sub> adsorption and NMR experiments, all the samples were dehydrated at 120 °C for 12 h under vacuum condition (<1×10<sup>-2</sup> Pa). When the samples were cooled to ambient temperature, the pyridine-*d*<sub>5</sub> was introduced from a vacuum line at room temperature. Then, the overloaded pyridine-*d*<sub>5</sub> was removed at 313 K for 10 min in vacuum. After adsorption of pyridine-*d*<sub>5</sub>, the sealed samples were transferred into a NMR rotor under a dry nitrogen atmosphere in a glovebox.

##### Solid-State NMR Experiments

<sup>1</sup>H MAS NMR spectra were recorded on a Bruker AvanceIII 600 spectrometer equipped with a 14.1 T wide-bore magnet using a 4 mm MAS probe with resonance frequencies of 600.13 MHz. The pulse width was 2.2 μs for a π/4 pulse, and 32 scans were accumulated with a 10 s recycle delay. Samples were spun at 12 kHz, and chemical shifts were referenced to adamantane at 1.74 ppm.

## Catalytic test

DMM (commercially available from Aldrich) carbonylation reactions were performed in a continuous-flow fixed-bed stainless steel reactor. Typically, 0.1 g of catalyst was loaded into a reactor tube (8 mm internal diameter). The sample was then heated to 120 °C for an hour under nitrogen atmosphere (30 ml min<sup>-1</sup>) to remove residual water and then cooled to the reaction temperature. DMM was carried into reactor by carbon monoxide, which was bubbled through a stainless steel saturator containing liquid DMM isothermally held at 20 °C. The chemical inert nitrogen was introduced to the reaction system to adjust the partial pressure of CO. The reaction effluent was analyzed by gas chromatography (Agilent 7890) equipped with a flame ionization detector. The DMM conversion and MMAc selectivity were calculated with the followed equations.

$$\text{DMM Conversion} = [1 - 3C_{\text{DMM}} / (3C_{\text{DMM}} + 2C_{\text{DME}} + 2C_{\text{MF}} + C_{\text{methanol}} + 3C_{\text{MMAc}})] \times 100\% \quad (1)$$

$$\text{MMAc selectivity} = [3C_{\text{MMAc}} / (2C_{\text{DME}} + 2C_{\text{MF}} + C_{\text{methanol}} + 3C_{\text{MMAc}})] \times 100\% \quad (2)$$

where  $C_i$  was the molar concentration of compound  $i$  in the reaction effluent and  $n$  was the number of carbon derived from DMM.

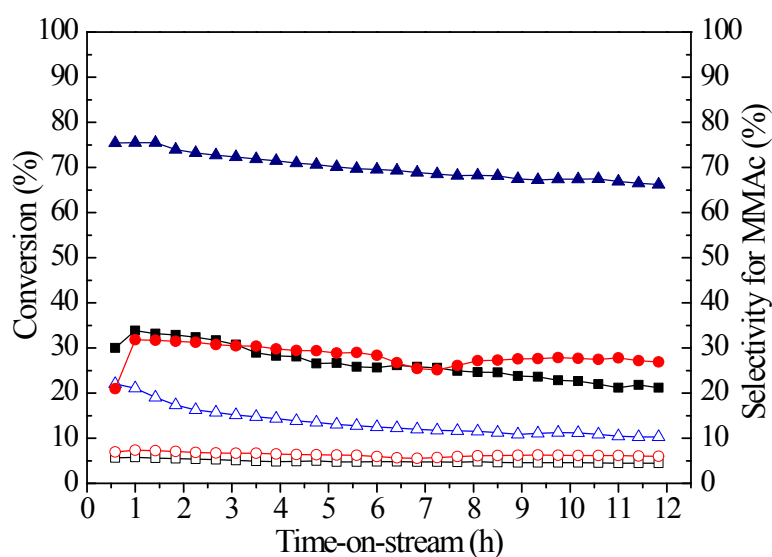

Figure SI 1 the effect of Si/Al ratio on the DMM conversion(▲ Si/Al=40; ○Si/Al=15;

□Si/Al=4.3) and selectivity to MMAc ( ▲Si/Al=40; ●Si/Al=15; ■Si/Al=4.3 ) at the same reaction condition (catalyst weight = 0.1 g, reaction pressure = 30.0 atm, reaction temperature = 110°C, DMM partial pressure = 0.42 atm, CO stream = 85 ml min<sup>-1</sup>).

Table SI 1 the catalytic performance over various sulfonic acids with different acid strength

| Sulfonic Acids                                                                    | H <sub>0</sub> <sup>a</sup> | Selectivity / % | Conversion /% | Rate of MMAc Synthesis/ mol (mol H <sup>+</sup> ) <sup>-1</sup> h <sup>-1</sup> |
|-----------------------------------------------------------------------------------|-----------------------------|-----------------|---------------|---------------------------------------------------------------------------------|
| CF <sub>3</sub> SO <sub>3</sub> H                                                 | -14.1 <sup>b1</sup>         | 92.8            | 27.0          | 12.6                                                                            |
| C <sub>4</sub> F <sub>9</sub> SO <sub>3</sub> H                                   | -13.2 <sup>b1</sup>         | 91.7            | 20.2          | 10.6                                                                            |
| H <sub>2</sub> SO <sub>4</sub>                                                    | -12.0 <sup>b1</sup>         | 90.0            | 10.5          | 4.4                                                                             |
| CH <sub>3</sub> SO <sub>3</sub> H                                                 | -7.8 <sup>b2</sup>          | 88.9            | <5.0          | <2.0                                                                            |
| CH <sub>3</sub> CH <sub>2</sub> SO <sub>3</sub> H                                 | >-7.8                       | 72.9            | <5.0          | <2.0                                                                            |
| p-CH <sub>3</sub> C <sub>6</sub> H <sub>4</sub> SO <sub>3</sub> H                 | +0.55 <sup>b3</sup>         | 79.2            | <5.0          | <2.0                                                                            |
| p-CH <sub>3</sub> CH <sub>2</sub> C <sub>6</sub> H <sub>4</sub> SO <sub>3</sub> H | >0.55                       | 76.1            | <5.0          | <2.0                                                                            |

a: H<sub>0</sub>, value of Hammett acidity function

b1: G. A. Olah, G. K. S. Prakash, J. Sommer, *superacids* Wiley, 1985 and G.A. Olah, G.K.S. Prakash, A. Molnar, J. Sommer, *Superacid Chemistry*. Wiley, 2009; b2: D. Fărcașiu and A. Ghenciu, *Progress in Nuclear Magnetic Resonance Spectroscopy*, 1996, **29**, 129-168. b3: L. K. Doraiswamy, *Organic Synthesis Engineering*, Oxford University Press, 2001.
